# Supplementary material for: Sclerostin blockade promotes bone metastases of Wnt‐responsive breast cancer cells
Source: PubMed Central journal article supplement — Cancer Sci. 2023 Mar 9;114(6):2460–70. doi: 10.1111/cas.15765 (PMC10236625; doi:10.1111/cas.15765), 2023-03-09
Supplement: CAS-114-2460-s001.pdf [file CAS-114-2460-s001.pdf]

**Supplementary Table S1: PCR primers for mouse cells.**

|              | Forward/Reverse                             | Product size (bp) |
|--------------|---------------------------------------------|-------------------|
| Mouse Wnt1   | ATAGCCTCCTCCACGAACCT/GGAATTGCCATTTGCACTCT   | 175               |
| Mouse Wnt2   | GGTCAGCTCTTCATGGTGGT/ATCTCTGTCCAGGGTGTTC    | 214               |
| Mouse Wnt2b  | TCAACGCTACCCAGACATCA/ACCACTCCTGCTGACGAGAT   | 195               |
| Mouse Wnt3   | AGGAGTGCCAGCATCAGTTC/ACTTCCAGCCTTCTCCAGGT   | 231               |
| Mouse Wnt3a  | CTGGCAGCTGTGAAGTGAAG/TGGGTGAGGCCTCGTAGTAG   | 201               |
| Mouse Wnt4   | CTGGAGAAGTGTGGCTGTGA/CAGCCTCGTTGTTGTGAAGA   | 184               |
| Mouse Wnt5a  | CAAATAGGCAGCCGAGAGAC/CTCTAGCGTCCACGAACTCC   | 217               |
| Mouse Wnt5b  | CTGCTTGCGTAATGAGACCA/AAAGCAACACCAGTGAACC    | 169               |
| Mouse Wnt6   | TCAGTTCCAGTTCGGTTTCC/CATGGAACAGGCTTGAGTGA   | 151               |
| Mouse Wnt7a  | GGTGCGAGCATCATCTGTAA/TCCTTCCCGAAGACAGTACG   | 191               |
| Mouse Wnt7b  | AAGCCTATGGAGACGGACCT/TTGGTGTACTGGTGCGTGT    | 176               |
| Mouse Wnt8a  | AGCACAGAGGCTGAGCTGA/TCTGCTCTCCTCTCCTCCAC    | 191               |
| Mouse Wnt8b  | GTGGACTTCGAAGCGCTAAC/CTGCTTGAAATTGCCTCTC    | 209               |
| Mouse Wnt9a  | TGCTTTCCTCTACGCCATCT/CCTTGACAACTTGCTGCTG    | 176               |
| Mouse Wnt9b  | TGGAGCGCTGTACTTGTGAC/GCACTTGCAAGTTGTTCTCA   | 218               |
| Mouse Wnt10a | CATGAGTGCCAGCATCAGTT/ACCGCAAGCCTTCAGTTTAC   | 195               |
| Mouse Wnt10b | GGAAGGGTAGTGGTGAGCAA/CTCTCCGAAGTCCATGTCGT   | 179               |
| Mouse Wnt11  | CAGGATCCCAAGCCAATAAA/GTAGCGGGTCTTGAGGTCAG   | 182               |
| Mouse Wnt16  | GAGCTGTGCAAGAGGAAACC/TGAATGCTGTCTCCTTGGTG   | 193               |
| Mouse Fzd1   | GTGCACCAGTTCTACCCTCT/TGGTAGCAAGGAGGGAGTTG   | 285               |
| Mouse Fzd2   | TGCGCTTCCACTTTCTTCAC/GGACAGAATCACCCACCAGA   | 282               |
| Mouse Fzd3   | AGGCCTGTACCATGCTCTTT/CGACAAAACACACGCCACTA   | 240               |
| Mouse Fzd4   | CTCAAGTGTGGCTACGATGC/GCCGCCTCTTCAAATCACA    | 260               |
| Mouse Fzd5   | CTGTGCTGTGCTTCATCTCC/CAGGGCCGGTAGTCTCATAG   | 210               |
| Mouse Fzd6   | AGAATGGGCCGGGTTCTTTA/TCCCTCTTTGACGGATGCTT   | 298               |
| Mouse Fzd7   | TCGGGTTGCTACTTCATGGT/GGCCAGATGAAAGTACTGCG   | 276               |
| Mouse Fzd8   | CAACCAGAGCCTTGACAACC/GTCGGTTGTGCTGCTCATAG   | 254               |
| Mouse Fzd9   | CTGGCTTTGTGTTGGTACCC/GTAGCAGACAATGACGCAGG   | 203               |
| Mouse Fzd10  | CTGGCTGCTGGAAAGAAGTG/AGTGCCGATGACTAGGTAGC   | 225               |
| Mouse Lrp5   | CCATACAGGCCCTACGTCAT/GGGAAGAGGTGGCAGTAACT   | 236               |
| Mouse Lrp6   | ATCTCCGGCGAATTGAAAGC/CTGCATGGATGTCACTCAGC   | 216               |
| Mouse Sost   | TGCCTCATCTGCCTACTTGT/AGCTGTA CTGACACATCT    | 211               |
| Mouse Dkk1   | TCTGCCTCCGATCATCAGAC/TAGTGTCTCTGGCAGGTGTG   | 238               |
| Mouse Pthrp  | CAGCCGAAATCAGAGCTACC/CTCCTGTTCTCTGCGTTTCC   | 206               |
| Mouse Gapdh  | TTGAAGGGTGGAGCCAAACG/ACACATTGGGGGTAGGAACACG | 388               |

**Supplementary Table S2: PCR primers for human cells.**

|              | Forward/Reverse                             | Product size (bp) |
|--------------|---------------------------------------------|-------------------|
| Human WNT1   | CGGCGTTTATCTTCGCTATC/GCCTCGTTGTTGTGAAGGTT   | 244               |
| Human WNT2   | GTGGATGCAAAGGAAAGGAA/AGCCAGCATGTCCTGAGAGT   | 152               |
| Human WNT2B  | CCGAGAATGGATCCGAGAGT/CTGCACACACTCAGTTCACC   | 201               |
| Human WNT3   | TGTGAGGTGAAGACCTGCTG/AAAGTTGGGGGAGTTCTCGT   | 207               |
| Human WNT3A  | CAAGATTGGCATCCAGGAGT/ATGAGCGTGTCCTGCAAAG    | 173               |
| Human WNT4   | GCTGTGACAGGACAGTGCAT/GCCTCATTGTTGTGGAGGTT   | 169               |
| Human WNT5A  | TGGCTTTGGCCATATTTTTTC/CCGATGTA CTGCATGTGGTC | 199               |
| Human WNT5B  | ATTAGCTTTGAACCCGGTGC/CCCAAAGACAGATGCGTTGT   | 229               |
| Human WNT6   | GTCACGCAGGCCTGTTCTAT/CGTCCATAAAGAGCCTCGAC   | 208               |
| Human WNT7A  | CCCACCTTCCTGAAGATCAA/ACAGCACATGAGGTCACAGC   | 183               |
| Human WNT7B  | TCAACGAGTGCCAGTACCAG/CCCTCGGCTTGGTTGTAGTA   | 229               |
| Human WNT8A  | GAACTGCCCTGAAAATGCTC/ATCCTTTCCCAAATTCAC     | 237               |
| Human WNT8B  | CCATGAACCTGCACAACAAC/TGAGTGCTGCGTGGTACTTC   | 174               |
| Human WNT9A  | GCAAGCATCTGAAGCACAAG/TGCTCTCGCAGTTCTTCTCA   | 246               |
| Human WNT9B  | GAGGACTCACCCAGCTTCTG/AAGCTCCTCCTGCACACATT   | 201               |
| Human WNT10A | AAGCTGCACCGCTTACA ACT/ATTCTCGCGTGGATGTCTCT  | 209               |
| Human WNT10B | GAAAACCTGAAGCGGAAATG/GGGTCTCGCTCACAGAAGTC   | 245               |
| Human WNT11  | TGACCTCAAGACCCGATACC/GCTTCCGTTGGATGTCTTGT   | 214               |
| Human WNT16  | GCTCCTGTGCTGTGAAAACA/TGCATTCTCTGCCTTGTGTC   | 249               |
| Human FZD1   | ATCGTCATCGCCTGCTACTT/TGTTGGTGAGCCTCGTGTAG   | 271               |
| Human FZD2   | GTCCTCAAGGTGCCATCCTA/CAGCCCGACAGAAAAATGAT   | 248               |
| Human FZD3   | CTCTCTTTGGCCCTTGACTG/ACAAAGAAAAGGCCGGAAT    | 223               |
| Human FZD4   | GCCAATGTGCACAGAGAAGA/AGGCTCCTTTTCACCCAGAT   | 284               |
| Human FZD5   | TTCTGGATAGGCCTGTGGTC/CGTAGTGGATGTGGTTGTGC   | 214               |
| Human FZD6   | TTGTTGGCATCTCTGCTGTC/CCATGGATTTGGAAATGACC   | 222               |
| Human FZD7   | CGACGCTCTTTACCGTTCTC/GCCATGCCGAAGAAGTAGAG   | 247               |
| Human FZD8   | CTCCATCTGGTGGGTGATCT/GGTGCCGATGAAGAGGTAGA   | 262               |
| Human FZD9   | AGACCATCGTCATCCTGACC/CCATGAGCTTCTCCAGCTTC   | 231               |
| Human FZD10  | TCTTTATGCTGCTGGTGGTG/GACTGGGCAGGGATCTCATA   | 208               |
| Human LRP5   | GCAGCCTTTCTTCCACACTC/TCTAGCGGGTCGTAGTCGAT   | 279               |
| Human LRP6   | TGGATGGTTCTGACCGTGTA/TCCCTCTCTGCACTTCGTTT   | 271               |
| Human SOST   | AGAATGATGCCACGGAATC/AAGTCCTTGAGCTCCGACTG    | 457               |
| Human DKK1   | TCCGAGGAGAAATTGAGGAA/CCACAGTAACAACGCTGGAA   | 283               |
| Human PTHrP  | CAAGATTTACGGCGACGATT/GGGCTTGCCCTTTCTTTTTCT  | 237               |
| Human GAPDH  | CATGGAGAAGGCTGGGGCTC/CACTGACACGTTGGCAGTGG   | 415               |
