# Supplementary material for: Sclerostin blockade promotes bone metastases of Wnt‐responsive breast cancer cells
Source: PubMed Central journal article supplement — Cancer Sci. 2023 Mar 9;114(6):2460–70. doi: 10.1111/cas.15765 (PMC10236625; doi:10.1111/cas.15765), 2023-03-09

**Supplementary Figure S1:**

**(A)** Effects of Wnt3a on monolayer proliferation of MDA-MB-231 cells as determined using a WST-8 assay. Data are expressed as fold changes in absorbance relative to the control at 48 hours. **(B)** Effects of Wnt 3a on cell migration of MDA-MB-231 cells as determined using a wound healing assay. Representative microscopic images at 0 and 24 hours after wounding are shown on the left (scale bar = 500  $\mu$ m). Data are expressed as filled wound area (%).

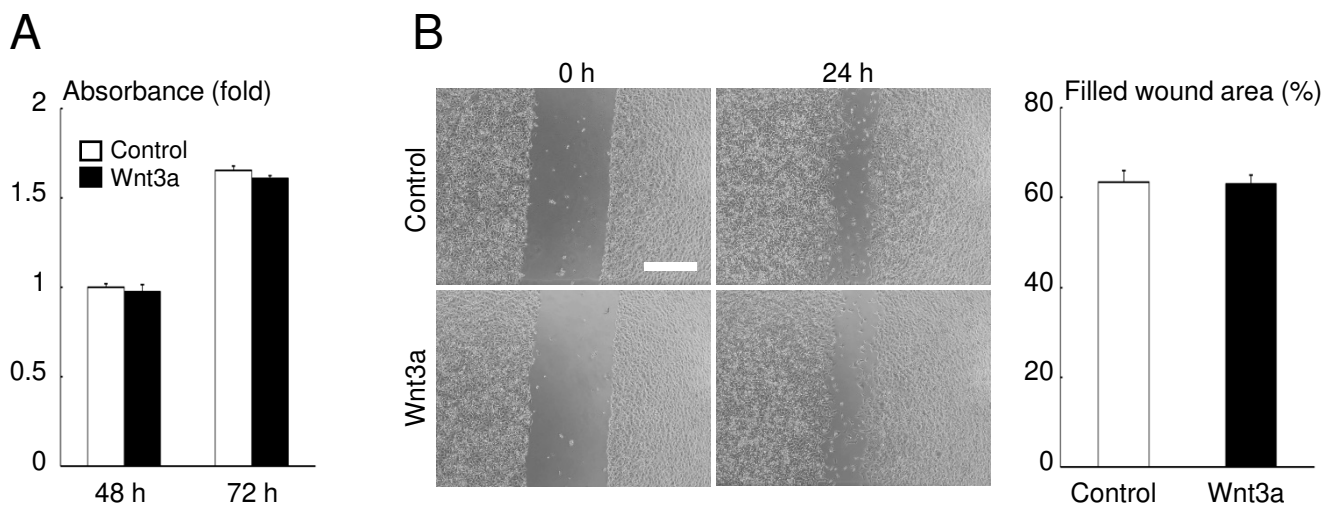

**Supplementary Figure S2:**

Effects of the anti-sclerostin antibody (Ab) on trabecular bone volume in non-tumor-bearing C57BL/6 (A), BALB/c (B), and athymic nude (C) mice. Representative  $\mu$ CT images are shown on the left (scale bar = 500  $\mu$ m). Data are expressed as bone volume/tissue volume (BV/TV, %,  $n = 6$  for C57BL/6 mice and  $n = 4$  for BALB/c and athymic nude mice). \* $p < 0.001$

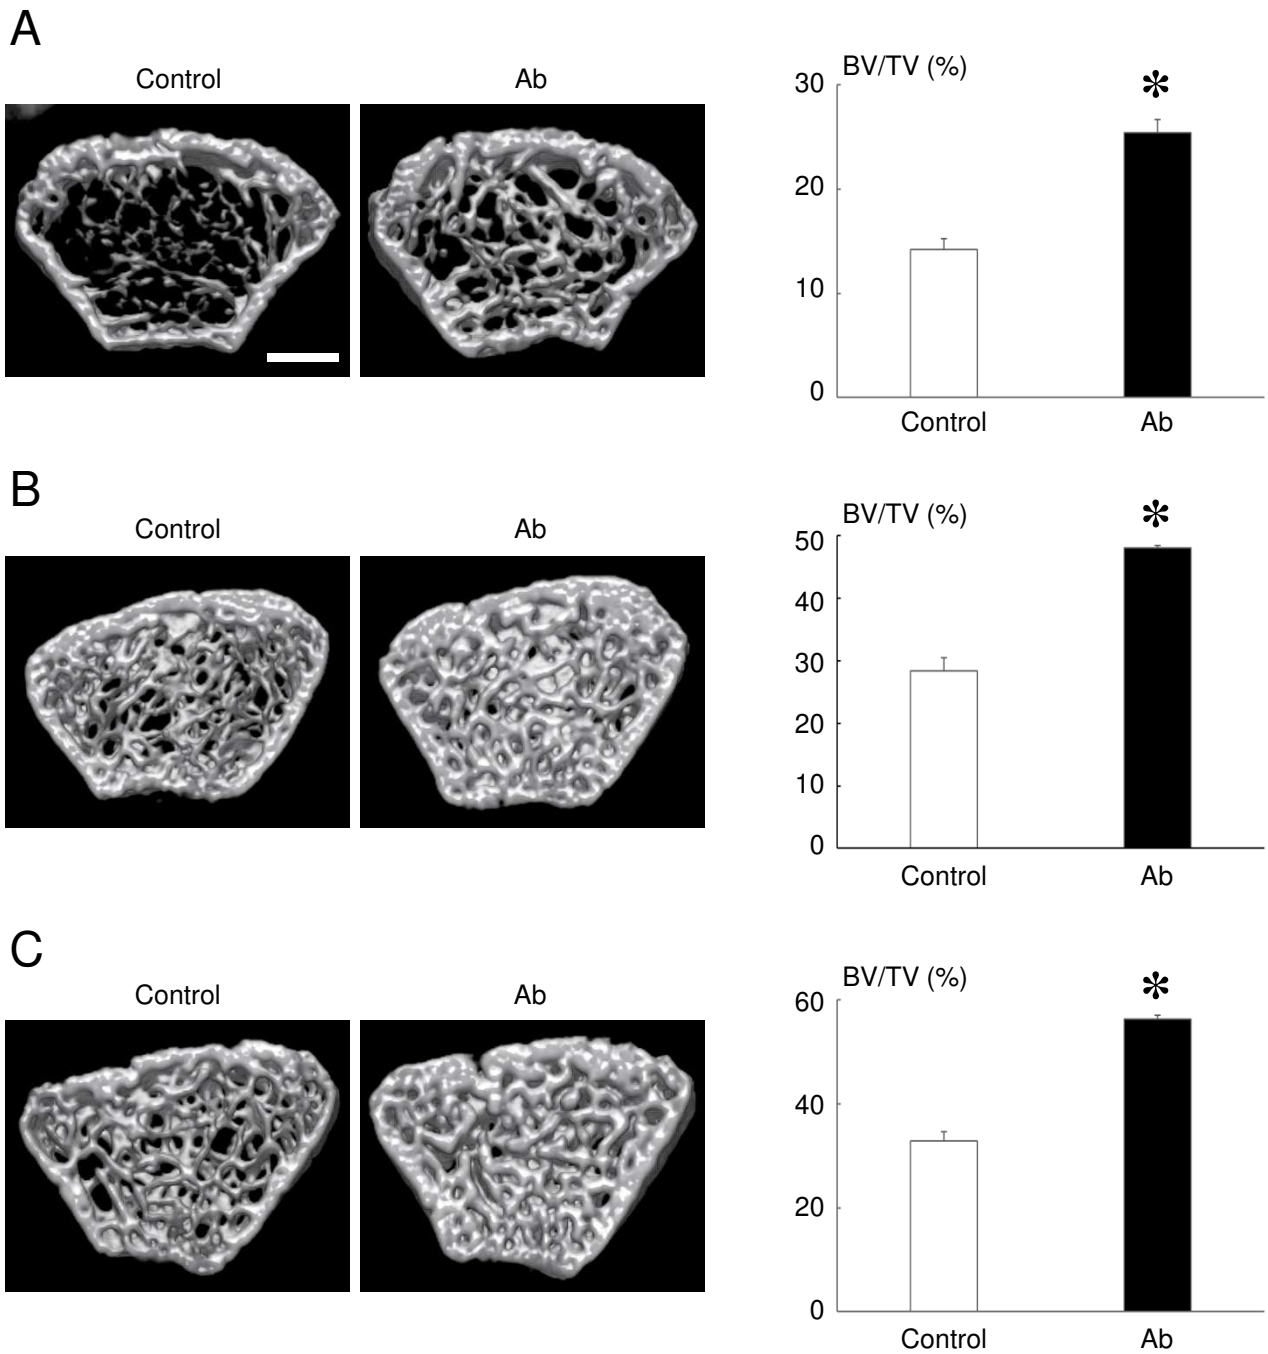

Supplement: CAS-114-2460-s002.pdf [file CAS-114-2460-s002.pdf]
